# Supplementary material for: Heart Rate Variability, Insulin Resistance, and Insulin Sensitivity in Japanese Adults: The Toon Health Study
Source: PubMed Central journal article supplement (PMC4549610; doi:10.2188/jea.je20140254), 2015-09-05
Supplement: je-25-583-s002.pdf [file je-25-583-s002.pdf]

**eTable 2.** Sex- and age-adjusted means<sup>a</sup> grouped according to quartiles of LF (n=1,899)

|                                       | Quartile of LF |       |       |       | <i>P</i> for difference |
|---------------------------------------|----------------|-------|-------|-------|-------------------------|
|                                       | Q1             | Q2    | Q3    | Q4    |                         |
| Age, years                            | 64.2           | 58.5  | 54.4  | 52.9  | <0.001                  |
| Men, %                                | 28.1           | 31.3  | 36.8  | 41.1  | <0.001                  |
| Body mass index, kg/m <sup>2</sup>    | 23.2           | 23.3  | 22.9  | 22.8  | 0.10                    |
| Waist circumference, cm               | 83.8           | 83.5  | 82.9  | 82.5  | 0.12                    |
| Systolic blood pressure, mm Hg        | 126.2          | 125.3 | 126.1 | 125.3 | 0.79                    |
| Diastolic blood pressure, mm Hg       | 76.9           | 76.2  | 75.9  | 74.9  | 0.060                   |
| Triglycerides <sup>a</sup> , mmol/L   | 1.06           | 1.07  | 1.03  | 1.04  | 0.68                    |
| LDL-cholesterol, mmol/L               | 3.11           | 3.11  | 3.12  | 3.09  | 0.95                    |
| HDL-cholesterol, mmol/L               | 1.57           | 1.58  | 1.58  | 1.58  | 0.94                    |
| Total cholesterol, mmol/L             | 5.32           | 5.34  | 5.32  | 5.30  | 0.93                    |
| Fasting glucose <sup>a</sup> , mmol/L | 5.14           | 5.11  | 5.09  | 5.11  | 0.56                    |
| Fasting insulin <sup>a</sup> , mmol/L | 35.8           | 33.8  | 33.7  | 32.2  | 0.055                   |
| HOMA-IR <sup>a</sup>                  | 1.18           | 1.11  | 1.10  | 1.05  | 0.057                   |
| Gutt's ISI <sup>a</sup>               | 1.81           | 1.88  | 1.84  | 1.94  | 0.013                   |
| Medication for hypertension, %        | 23.9           | 16.6  | 20.0  | 20.2  | 0.035                   |
| Medication for dyslipidemia, %        | 14.2           | 13.6  | 13.0  | 11.4  | 0.62                    |
| Current smoker, %                     | 11.8           | 9.5   | 6.6   | 7.3   | 0.028                   |
| Regular drinker, %                    | 48.6           | 51.0  | 54.4  | 52.9  | 0.29                    |
| Physical activity, METs·h/day         | 35.5           | 35.6  | 35.6  | 35.8  | 0.81                    |

ISI, insulin sensitivity index; HDL, high-density lipoprotein; HOMA-IR, homeostasis model assessment index for insulin resistance; LDL, low-density lipoprotein; LF, low frequency; METs, metabolic equivalents.

Values are adjusted for sex and age by analysis of covariance. Age and sex values are shown in crude means and percentages.

<sup>a</sup>Represented as geometric means and standard deviations
