# Supplementary material for: Heart Rate Variability, Insulin Resistance, and Insulin Sensitivity in Japanese Adults: The Toon Health Study
Source: PubMed Central journal article supplement (PMC4549610; doi:10.2188/jea.je20140254), 2015-09-05
Supplement: je-25-583-s003.pdf [file je-25-583-s003.pdf]

**eTable 3.** Sex- and age-adjusted means<sup>a</sup> b grouped according to quartiles of HF (n=1,899)

|                                       | Quartile of HF |       |       |       | <i>P</i> for difference |
|---------------------------------------|----------------|-------|-------|-------|-------------------------|
|                                       | Q1             | Q2    | Q3    | Q4    |                         |
| Age, years                            | 62.7           | 58.6  | 54.0  | 54.6  | <0.001                  |
| Men, %                                | 37.8           | 36.4  | 31.0  | 32.1  | 0.081                   |
| Body mass index, kg/m <sup>2</sup>    | 23.6           | 23.0  | 22.8  | 22.8  | <0.001                  |
| Waist circumference, cm               | 84.9           | 83.1  | 82.5  | 82.2  | <0.001                  |
| Systolic blood pressure, mm Hg        | 127.2          | 125.8 | 124.6 | 125.3 | 0.16                    |
| Diastolic blood pressure, mm Hg       | 78.1           | 76.3  | 75.0  | 74.5  | <0.001                  |
| Triglycerides <sup>a</sup> , mmol/L   | 1.12           | 1.06  | 1.01  | 1.01  | 0.004                   |
| LDL-cholesterol, mmol/L               | 3.13           | 3.16  | 3.05  | 3.08  | 0.12                    |
| HDL-cholesterol, mmol/L               | 1.56           | 1.55  | 1.59  | 1.60  | 0.17                    |
| Total cholesterol, mmol/L             | 5.36           | 5.36  | 5.27  | 5.30  | 0.29                    |
| Fasting glucose <sup>a</sup> , mmol/L | 5.17           | 5.12  | 5.06  | 5.10  | 0.010                   |
| Fasting insulin <sup>a</sup> , mmol/L | 37.0           | 34.9  | 31.7  | 32.1  | <0.001                  |
| HOMA-IR <sup>a</sup>                  | 1.23           | 1.14  | 1.03  | 1.05  | <0.001                  |
| Gutt's ISI <sup>a</sup>               | 1.76           | 1.84  | 1.94  | 1.94  | <0.001                  |
| Medication for hypertension, %        | 22.7           | 16.6  | 19.3  | 22.1  | 0.051                   |
| Medication for dyslipidemia, %        | 14.9           | 13.2  | 13.6  | 10.5  | 0.20                    |
| Current smoker, %                     | 9.7            | 9.8   | 8.6   | 7.0   | 0.35                    |
| Regular drinker, %                    | 52.6           | 50.2  | 52.0  | 52.1  | 0.86                    |
| Physical activity, METs·h/day         | 35.3           | 36.0  | 35.5  | 35.8  | 0.086                   |

ISI, insulin sensitivity index; HDL, high-density lipoprotein; HF, high frequency; HOMA-IR, homeostasis model assessment index for insulin resistance; LDL, low-density lipoprotein; METs, metabolic equivalents.

Values are adjusted for sex and age by analysis of covariance. Age and sex values are shown in crude means and percentages.

<sup>a</sup> Represented as geometric means and standard deviations
