# Supplementary material for: Heart Rate Variability, Insulin Resistance, and Insulin Sensitivity in Japanese Adults: The Toon Health Study
Source: PubMed Central journal article supplement (PMC4549610; doi:10.2188/jea.je20140254), 2015-09-05
Supplement: je-25-583-s004.pdf [file je-25-583-s004.pdf]

**eTable 4.** Sex- and age-adjusted means<sup>a</sup> grouped according to quartiles of LF/HF ratio (n=1,899)

|                                       | Quartile of LF/HF ratio |       |       |       | <i>P</i> for difference |
|---------------------------------------|-------------------------|-------|-------|-------|-------------------------|
|                                       | Q1                      | Q2    | Q3    | Q4    |                         |
| Age, years                            | 60.4                    | 57.2  | 55.7  | 56.4  | <0.001                  |
| Men, %                                | 24.9                    | 29.5  | 38.2  | 44.9  | <0.001                  |
| Body mass index, kg/m <sup>2</sup>    | 22.8                    | 23.0  | 23.2  | 23.3  | 0.049                   |
| Waist circumference, cm               | 82.6                    | 82.6  | 83.3  | 84.2  | 0.020                   |
| Systolic blood pressure, mm Hg        | 125.4                   | 125.4 | 125.2 | 126.9 | 0.38                    |
| Diastolic blood pressure, mm Hg       | 75.5                    | 76.0  | 75.2  | 77.2  | 0.025                   |
| Triglycerides <sup>a</sup> , mmol/L   | 1.04                    | 1.02  | 1.05  | 1.09  | 0.15                    |
| LDL-cholesterol, mmol/L               | 3.06                    | 3.08  | 3.12  | 3.16  | 0.19                    |
| HDL-cholesterol, mmol/L               | 1.59                    | 1.58  | 1.57  | 1.57  | 0.77                    |
| Total cholesterol, mmol/L             | 5.29                    | 5.29  | 5.33  | 5.38  | 0.32                    |
| Fasting glucose <sup>a</sup> , mmol/L | 5.09                    | 5.12  | 5.08  | 5.16  | 0.071                   |
| Fasting insulin <sup>a</sup> , mmol/L | 33.6                    | 32.7  | 33.4  | 35.7  | 0.095                   |
| HOMA-IR <sup>a</sup>                  | 1.10                    | 1.07  | 1.09  | 1.18  | 0.065                   |
| Gutt's ISI <sup>a</sup>               | 1.88                    | 1.91  | 1.90  | 1.78  | 0.004                   |
| Medication for hypertension, %        | 22.6                    | 21.1  | 19.6  | 17.3  | 0.18                    |
| Medication for dyslipidemia, %        | 13.0                    | 11.1  | 13.6  | 14.6  | 0.43                    |
| Current smoker, %                     | 8.5                     | 9.4   | 8.6   | 8.7   | 0.96                    |
| Regular drinker, %                    | 50.0                    | 52.2  | 51.0  | 53.7  | 0.65                    |
| Physical activity, METs·h/day         | 35.7                    | 35.4  | 35.8  | 35.6  | 0.65                    |

ISI, insulin sensitivity index; HDL, high-density lipoprotein; HF, high frequency; HOMA-IR, homeostasis model assessment index for insulin resistance; LDL, low-density lipoprotein; LF, low frequency; METs, metabolic equivalents.

Values are adjusted for sex and age by analysis of covariance. Age and sex values are shown in crude means and percentages.

<sup>a</sup> Represented as geometric means and standard deviations
